# Supplementary material
Source: bioRxiv or medRxiv preprint supplement (https://www.biorxiv.org/highwire/filestream/128033/field_highwire_adjunct_files/0/425389-1.pdf)
Supplement: Supplementary file [file 425389-1.pdf]

## Supplementary Material

### Genetic basis and timing of a major mating system shift in *Capsella*

Jörg A. Bachmann<sup>1,9</sup>, Andrew Tedder<sup>1,6,9</sup>, Benjamin Laenen<sup>1,9</sup>, Marco Fracassetti<sup>1</sup>, Aurélie Désamoré<sup>1</sup>, Clément Lafon-Placette<sup>2,7</sup>, Kim A. Steige<sup>1,8</sup>, Caroline Callot<sup>3</sup>, William Marande<sup>3</sup>, Barbara Neuffer<sup>4</sup>, Hélène Bergès<sup>3</sup>, Claudia Köhler<sup>2</sup>, Vincent Castric<sup>5</sup>, Tanja Slotte<sup>1\*</sup>

<sup>1</sup>Department of Ecology, Environment and Plant Sciences, Science for Life Laboratory, Stockholm University, SE-106 91 Stockholm, Sweden

<sup>2</sup>Department of Plant Biology, Swedish University of Agricultural Sciences & Linnean Center for Plant Biology, SE-75 007 Uppsala, Sweden

<sup>3</sup>Institut National de la Recherche Agronomique UPR 1258, Centre National des Ressources Génomiques Végétales, Castanet-Tolosan, France

<sup>4</sup>Department of Botany, University of Osnabruck, 49076 Osnabruck, Germany

<sup>5</sup>Unité Evo-Eco-Paléo (EEP) - UMR 8198, CNRS/Université de Lille - Sciences et Technologies, Villeneuve d'Ascq Cedex, F-59655, France

<sup>6</sup>Present address: School of Chemistry and Biosciences, Faculty of Life Sciences, University of Bradford, Bradford BD7 1DP, UK

<sup>7</sup>Present address: Department of Botany, Charles University, CZ-128 01 Prague, Czech Republic

<sup>8</sup>Present address: Institute of Botany, Biozentrum, University of Cologne, 50674 Cologne, Germany.

<sup>9</sup>These authors contributed equally.

\*Author for correspondence: [tanja.slotte@su.se](mailto:tanja.slotte@su.se)

## Supplementary Text

### Genetic mapping of the loss of self-incompatibility in *Capsella orientalis*

#### *Generation of an interspecific C. orientalis x C. grandiflora F2 mapping population*

To map the genetic basis of self-compatibility in *Capsella orientalis*, we generated an interspecific *C. orientalis* × *C. grandiflora* F2 mapping population. This required an embryo rescue protocol, as F1 seeds were aborted prior to full development. To produce viable F1 hybrids, *C. orientalis* accession Co2008-1 (Table S1) was crossed as a seed plant with *C. grandiflora* Cg88.15 as pollen donor (Table S1). Fourteen days after pollination, siliques were surface sterilized by dipping them successively in 70% (v/v) ethanol and a sterilizing solution (5% (v/v) sodium hypochloride, 0.01% (v/v) Tween 20). Embryos were then dissected out of the seeds in sterile ½ MS solution using fine needles, and put on MS plates (½ MS, 2% (w/v) sucrose; Murashige and Skoog basal salt mixture, Sigma-Aldrich Co. MI, USA). A total of 29 embryos were collected. Plates were then covered and placed under long days condition (16 hrs light and 8 hrs darkness) at a temperature of 22°C light and 20°C darkness and a light intensity of 110 µE during two weeks. Afterwards, seedlings were transferred to soil and grown in a growth chamber at 60% humidity and daily cycles of 16 hrs light at 21°C and 8 hrs darkness at 18°C. The resulting F1 individuals were self-compatible, and we obtained F2 seeds from one autonomously self-pollinated F1 individual.

F2 seeds were surface-sterilised and stratified at 2-4°C in the dark for two weeks on ½ MS medium (Murashige and Skoog basal salt mixture, Sigma-Aldrich Co. MI, USA). Plates were then moved to a climate chamber for seeds to germinate (16 h light at 20°C / 8 h dark at 18 °C, 70 % max. humidity, 122 uE light intensity). and after one week, seedlings were transplanted onto soil in the same growth chamber conditions. Germination rate was >80%, and we used a total of 350 F2 individuals for QTL mapping.

#### *Phenotyping of F2s*

We recorded self-incompatibility / self-compatibility (SI/SC) in 321 F2 individuals. First, SI/SC was visually scored as presence or absence of silique formation on mature individuals. Second, we manually self-pollinated 3-6 flowers of 204 F2 individuals to verify that SI individuals are functionally SI, and are not simply kept from autonomous selfing due to e.g. a flower structure closer to the outcrossing parent *C. grandiflora* than the autonomous selfer *C. orientalis*. We recorded the number of enlarged siliques one week after self-pollination. As flower structure seemed to have a major impact on the efficacy of autonomous self-pollination in our F2 population (approximately 30% of plants initially scored as SI based on silique formation after autonomous self-pollination formed seeds after manual self-pollination, whereas only ~2% of F2s that were called as SC after autonomous self-pollination formed no siliques after manual self-pollination), we preferentially used the scoring based on manual self-pollination in our analyses. Third, to validate that the SI phenotype is due to pollen tube growth arrest and the lack of seed development following self-pollination is not due to other reasons, e.g. inbreeding depression or genetic incompatibilities between *C. orientalis* and *C. grandiflora*, we assessed pollen tube growth in the pistil after manual self-pollination in a subset of F2 individuals scored as SI based on silique formation after autonomous self-pollination. For 9 out of 10 individuals scored as SI, manual self-pollination did not result in pollen tube growth. Pistils were fixed in EtOH: acetic acid 9:1 for > 2 hours, softened in 1N NaOH 60°C for 20 minutes and stained with 0.01% decolorised aniline blue in 2% solution of K<sub>3</sub>P0<sub>4</sub> for 2 hours. Pollen tubes were visualised by mounting the pistils on a microscope slide and observation under an epifluorescence microscope (Zeiss Axiovert 200M). In total, 321 F2 individuals were scored for SI/SC status.

## Genotyping of F2s

We extracted DNA from young leaves of 350 F2s using a standard Qiagen DNeasy kit (Qiagen). Following digestion of genomic DNA with EcoRI, RAD-seq libraries were generated at the National Genomics Infrastructure at SciLifelab Stockholm. EcoRI-digested samples were prepared using the Agilent Bravo system (protocol available at Github: <https://github.com/ngi-automation/rad-seq>). During preparation a custom adapter with complementary bases to the EcoRI overhang was ligated to the ends of the digested DNA using T4 DNA ligase and 10X T4 DNA ligase (New England Biolabs). The ligated adapter contains Illumina adapter sequences for incorporation amplification in a later step. Samples were purified using AMPure bead purification (Beckman Coulter), strand displacement using Bst 2.0 polymerase, 10X ThermoPol buffer (New England Biolabs) and dNTPs (Thermo Scientific), a second bead purification before the amplification of DNA and a final bead purification of the finished library. To evaluate the quality of the library a concentration measurement using Qubit dsDNA HS Assay kit (Thermo Fisher Scientific) and an analysis of library size using Fragment Analyzer (Kem-en-Tec) was performed. A calculated concentration in the range of 420-720 bp was used to even out the contribution of the different samples to the the pool before subjecting the pool to size selection on the LabChip XT (PerkinElmer) and concentration and size was analyzed before sequencing. Samples were sequenced on an illumina HiSeq 2500 High Output v4 mode with 2x125bp reads.

The demultiplexed reads were trimmed with Trimmomatic (Bolger et al. 2014) to remove remaining Nextera adapters, with a sliding window approach (step size 4, window size 20). Base pairs at trailing and leading sequence ends with a quality score below 20 were removed. After trimming only proper paired reads with a length above 50 base pairs were retained.

The reads were mapped to the *Capsella rubella* v 1.0 genome (Slotte et al. 2013), using BWA-MEM (Li 2013) with default parameters. We called SNPs and genotypes using the GATK (The Genome Analysis Toolkit) pipeline (McKenna et al. 2010; DePristo et al. 2011; Van der Auwera et al. 2013). First, the base pair quality scores of the mapped reads were recalibrated (Base Quality Score Recalibration) using a set of 1,538,085 SNPs identified in *C. grandiflora* (Williamson et al. 2014). Second, we allow the presence of duplicated reads with the -drf option, since many reads mapped in the same genomic positions in GBS data differently from whole genome sequencing. Eventually, SNPs were called using the GATK UnifiedGenotyper. Only biallelic SNPs with a minimum sequencing depth of 8, maximum depth of 200 and present at least in 80% of the samples were retained. Furthermore we filtered out the SNPs present in repeated region identified with RepeatMasker v4.0.7 (<http://www.repeatmasker.org>). The SNPs were phased by reference to genome-resequencing data for the *C. orientalis* Co2008-1 parent (see section "Whole genome resequencing" below). The final genetic data set consisted of 998 SNPs in 350 individuals.

## QTL mapping of loss of self-incompatibility

We constructed a genetic map with the R/Qtl package (Broman et al. 2003) in R 3.4.2. We removed SNPs that had redundant genotype information, were assigned to the wrong linkage group based on position information from the *C. rubella* genome, or showed segregation distortion. The genetic map was based on 549 SNPs in 328 individuals. Using a logarithm of odds (LOD) score cutoff of 6, we obtained 8 linkage groups that correspond to the haploid chromosome number of 8 chromosomes of diploid *Capsella spp.* The QTL mapping was performed on 304 F2 individuals scored for SI status and present in the genetic map. We conducted interval mapping with a binary data model using the Haley & Knott regression method in intervals of 1 cM, with a 1% genome-wide significance threshold obtained by 1000

permutations. We obtained 1.5-LOD confidence intervals for the significant QTL. We estimated the additive allelic effect (half the phenotypic difference between *C. grandiflora* and *C. orientalis* homozygotes) and dominance deviation at the QTL peak using the Rqtl effectscan function. To assess whether scoring of SI after autonomous or manual self-pollination had an effect on the detected QTL, we repeated the QTL analysis using the two phenotyping scores separately with the same parameters used previously. Visual SI/SC score was available for 228 individuals, whereas the score based on number of siliques formed was available for 195 genotyped individuals. In both cases, there was a significant QTL for self-compatibility in the genomic region that harbors the *S*-locus (Figure S8).

## Sequencing and annotation of the *S*-locus

### *BAC library construction and screening*

Because the *S*-locus is a region under strong balancing selection, reference-based whole-genome resequencing approaches cannot be used to study *S*-locus evolution. Instead, we opted for targeted sequencing and assembly of *S*-haplotypes using long-read sequencing of *S*-locus containing bacterial artificial chromosome (BAC) clones. This strategy results in high-quality assemblies, especially when combining long-read assembly with short-read based error correction (Bachmann et al. 2018). To identify putative causal genetic changes responsible for loss of SI, we sequenced and annotated *S*-haplotypes from two *C. orientalis* accessions (Co1719/11 and Co1979/09; Table S1). We also sequenced two *C. grandiflora* *S*-haplotypes, one identified as harboring an *S*-haplotype highly similar to that of *C. orientalis* (accession Cg2-2-KS2; Table S1) and one (accession Cg88.15) representing the *C. grandiflora* *S*-haplotype segregating in our F2 mapping population. Finally, we obtained *S*-haplotypes of the *C. orientalis*-derived B-subgenome from five *C. bursa-pastoris* individuals covering the species range in Eurasia (Table S1), for use in analyses of the timing of the loss of SI in *C. orientalis* (see "Timing of the loss of self-incompatibility in *C. orientalis*" below). In total, we generated and annotated eight full-length *S*-locus haplotypes from *Capsella* spp. (two from *C. orientalis*, two from *C. grandiflora*, and four from the *C. bursa-pastoris* B-subgenome).

Plants for BAC library construction were grown as previously described (Bachmann et al. 2018) and at least 5 g of leaf material was collected per plant for bacterial artificial chromosome (BAC) library production, except in the case of Cg88.15, where combined leaf material of 11 SI F2 plants was used. One BAC library was generated based on material from two *C. bursa-pastoris* accessions (Table S1) the resulting *S*-haplotype from this library is termed CH1. BAC libraries were generated and screened at the French Plant Genomic Resource Centre (CNRGV). BACs containing *S*-locus haplotypes of interest were identified based on insert size and hybridisation with DNA probes of genes flanking the *S*-locus.

### *Sequencing, assembly and annotation of BAC clones*

BAC clones with *S*-haplotypes of interest were sequenced to high coverage using SMRT sequencing (150-400 x; Table S2), and by short-read sequencing on an Illumina MiSeq (>380 x; Table S2) at the SciLifeLab National Genomics Infrastructure (NGI), Uppsala. BAC clone sequences were assembled in HGAP.3 based on SMRT sequencing data, except that from Cg88.15, which was instead assembled using Canu (v1.7) (Koren et al. 2017) with default parameter and target genome size of 1Mb. For all BAC assemblies, short-read sequencing data was subsequently used to correct indel errors in long-read assemblies, as previously described (Bachmann et al. 2018).

*S*-locus haplotypes were subsequently annotated as previously described (Bachmann et al. 2018). Briefly, we annotated our *S*-locus assemblies using Augustus v3.2.3 (Stanke et al.



2004) and RepeatMasker v4.0.7 <http://www.repeatmasker.org>), run via Maker v2.31.9 (Holt and Yandell 2011). We used *Arabidopsis thaliana* as a model prediction species and protein homology data for *SRK*, *U-box* and *ARK3* from *Arabidopsis lyrata* and *A. halleri*. Due to the high levels of sequence diversity at the key *S*-locus genes *SRK* and *SCR*, they were difficult to annotate automatically using Maker. To annotate *SRK*, we instead searched for *SRK* exon 1 sequences within the *S*-haplotypes by scanning for sequence similarity between general *SRK* exon 1 forward / reverse primers (*SRLF* / *SLGR*) (for more details, see (Bachmann et al. 2018)). Sequence similarity (BLASTN) to known *SRK* exon 1 sequences was used to accept the candidate loci as *SRK*, while we used close similarity to *ARK3* as a rejection criterion. To annotate *SCR*, we used a window-based approach to screen for the characteristic pattern of cysteine residues after translation of the DNA sequence in all three frames. Using this approach, we identified a region highly similar to *SCR* in *A. halleri* *S*-locus haplotype *S12* (GenBank accession number KJ772374.1) in our *S*-locus BAC sequences. Using BLASTN we found high similarity between the Cg88.15 *S*-haplotype and the *S*-haplotype *A. halleri* *S4* (GenBank accession KJ461484), and the Cg88.15 *S*-haplotype was therefore annotated by reference to the *A. halleri* *S4* sequence annotation.

#### Identification of a *C. grandiflora* *S*-haplotype highly similar to *C. orientalis*

Using a dataset of Brassicaceae *SRK* exon 1 and *ARK3* sequences downloaded from Genbank for a previous study (Bachmann et al. 2018) we made an alignment of *SRK* exon 1 sequences using MAFFT v7.245 & E-INS-I algorithm (Katoh et al. 2002). Manual curation and error correction of the alignment was performed in SeaView v4.6 (Gouy et al. 2010). We generated a maximum likelihood phylogenetic tree from the alignment between *SRK* sequences with RaXML v8.2.3 (GTRGAMMA model and 1000 bootstraps replicates) and then plotted the *SRK* phylogeny in R v. 3.3.1.

Based on the phylogenetic tree, we identified an *SRK* sequence in *C. grandiflora* accession Cg2-2-KS2 with high similarity to *SRK* from *C. orientalis* and *C. bursa-pastoris* B. Sequence identity between of this *SRK* allele from Cg2-2-KS2 and *C. orientalis* *SRK* was 98.3% (estimates were identical for both *C. orientalis* accessions), which is above the level of sequence similarity considered to represent the same specificity in *Arabidopsis* (Castric et al. 2008; Tsuchimatsu et al. 2012). Due to the high sequence similarity of this *C. grandiflora* *S*-haplotype to *A. halleri* *S12*, we termed this *S*-haplotype Cg*S12*. We further assessed sequence conservation across the entire *S*-locus to check whether the region of high sequence similarity between this *S*-haplotype and the *C. orientalis* *S*-haplotype was limited to *SRK*. For this purpose, we aligned *S*-locus sequences in AliView v. 1.20 (Larsson 2014), using Muscle v. 3.8.31 (Edgar 2004) with block alignment, calculated pairwise sequence conservation in 250 bp sliding windows, and visualized the results in R v. 3.3.1.

#### Candidate mutations for the loss of SI in *C. orientalis*

To identify candidate causal mutations for the loss of SI in *C. orientalis*, we analyzed sequence alignments of the two key *S*-locus genes *SRK* and *SCR*, as well as of the *S*-linked *U-box* gene, which may act as a modifier of the SI response. Specifically, we searched for major-effect changes such as frameshifts, premature stop codons or non-consensus splice sites that were found in sequences from the self-compatible *C. orientalis* and/or in the *C. bursa-pastoris* B subgenome, which is derived from *C. orientalis*, but not in the self-incompatible *C. grandiflora* Cg*S12* or *A. halleri* *S12* (GenBank accession number KJ772374.1).

There were no major-effect changes in our *C. orientalis* *S*-haplotypes compared to *C. grandiflora* Cg*S12* or *A. halleri* *S12* in either the *SRK* or *U-box* genes. However, in *SCR*, a frameshift deletion was predicted to be present in both *C. orientalis* *S*-haplotypes and in two of our *C. bursa-pastoris* B sequences (the other two *C. bursa-pastoris* B sequences had an

overlapping larger deletion in this region). The *SCR* frameshift deletion was not found in *C. grandiflora* *CgS12*. To check whether this deletion was fixed in *C. orientalis* we analyzed Illumina whole-genome resequencing data from an additional 25 accessions (Supplementary table S1). We mapped the trimmed data to a *C. rubella* reference modified to include a *C. orientalis* *S*-haplotype, as described in the section “Timing of loss of self-incompatibility in *C. orientalis*” below and scored visual presence or absence of the deletion on .bam files in IGV v2.4.2 (Robinson *et al.* 2011)

### Assessing the functionality of *C. orientalis* *SCR*

We performed controlled crosses to verify that *C. grandiflora* *CgS12* confers SI, and to assess the functionality of *SCR* in *C. orientalis*. To verify functional SI in *C. grandiflora* carrying *CgS12*, we performed 12 manual self-pollinations of a *C. grandiflora* individual carrying the *CgS12* *S*-haplotype. We further assessed the success of manual self-pollination of *C. orientalis* by performing 6 manual self-pollinations. To assess whether *C. orientalis* *SCR* is functional, we crossed *C. grandiflora* harboring *CgS12* as a seed parent to *C. orientalis* as a pollen donor. We performed a total of 112 crosses of this type, with two different *C. orientalis* accessions as pollen donors and three different *CgS12*-carrying *C. grandiflora* as seed parents (Supplementary Table S1). If *C. orientalis* *SCR* is functional, and provided that *CgS12* *SRK* is expressed, then we expect this cross to be incompatible, whereas if *C. orientalis* *SCR* is nonfunctional, the cross should be compatible. The reciprocal cross of the same individuals was also carried out with the same accessions (total 84 crosses of this type). Finally, we performed 12 crosses of *C. grandiflora* harboring other *S*-haplotypes to *C. grandiflora* harboring *CgS12*, and 12 to *C. orientalis*. These crosses are expected to be successful. We observed pollen tube growth in the pistil 12 hours after pollination. Pollen tube germination was visualized as described in the section “Genetic mapping of loss of SI in *C. orientalis*”. We compared the number of pollen tubes among different types of crosses using a Kruskal-Wallis test (Fig. S3).

### Expression of *SCR*, *SRK* and *U-box*

To assess whether *SRK*, *SCR* and *U-box* were expressed in *C. orientalis* flower buds, we generated RNAseq data from the same two *C. orientalis* accessions (Co1719/11 and Co1979/09) for which we had sequenced the *S*-locus using targeted long-read sequencing. Briefly, three biological replicates (different individuals) of two *C. orientalis* accessions (Co1719/11 and Co1979/09) were grown at long-day conditions and mixed-stage flower buds were collected for each sample, as previously described (Steige *et al.* 2017). For comparison, we also collected leaf samples from the same individuals. RNA was extracted using a Qiagen RNEasy Plant Mini Kit (Qiagen) and RNAseq libraries were constructed using the TruSeq RNA v2 kit. Sequencing of 100-bp paired-end reads was done on an Illumina HiSeq 2000 instrument. Reads were trimmed with Trimmomatic (Bolger *et al.* 2014) with a sliding window approach (step size 4, window size 20). The reads were mapped using STAR software v.2.2.1 (Dobin *et al.* 2013) against a modified v1.0 reference *C. rubella* assembly (Slotte *et al.* 2013), where the *S*-locus region (scaffold\_7 7523601:7562919) was masked and the *S*-locus from *C. orientalis* Co1719/11 was added.

Expression was quantified as RPKM (the number of reads per kb per million mapped reads (Mortazavi *et al.* 2008)) and mean values and standard errors over our three biological replicates are presented in Table S4. *SCR* is known to be specifically expressed in anther tapetum and in pollen (Shiba *et al.* 2006), which constitute a small and variable fraction of the mixed-stage flower buds used for RNAseq here. Despite this limitation, we still found evidence for expression of *SCR* in flower buds but not leaves of both *C. orientalis* accessions examined (Table S4), although at a higher level in accession Co1719/11 than in accession

Co1979/09, in this data set. We also found evidence for expression of *SRK* and *U-box* in flowers (Table S4).

To validate our inference that *SCR* is expressed in *C. orientalis* and assess whether *SCR* is expressed in *C. grandiflora* harboring the *CgS12* haplotype, we conducted qualitative RT-PCR with primers specific to *SCR* in *C. orientalis* and *C. grandiflora CgS12*. In this assay, we detected expression of *SCR* in flower buds of both the Co1719/11 and Co1979/09 accessions, as well as in three *C. grandiflora* individuals harboring *CgS12* (Fig. S4). We collected fresh mixed-stage flower buds, <100 mg per sample, and extracted total RNA with the RNeasy Plant Mini Kit (Qiagen, Venlo, The Netherlands). Apart from the standard protocol, we included a DNA digestion step with RNase-Free DNase (Qiagen, Venlo, The Netherlands). A DNA digestion with RNase-Free DNase (Qiagen, Venlo, The Netherlands) was added to the standard RNeasy protocol for plant tissue. We eluted the RNA in RNase-free water (Qiagen, Venlo, The Netherlands) and measured 10x diluted RNA with the RNA 6000 Nano Kit (Agilent Technologies Inc. Waldbronn, Germany) on an Agilent 2100 Bioanalyzer (Agilent Technologies Inc. Waldbronn, Germany). Only samples with RIN value > 8 were kept. For cDNA generation, we took 0.8 µg of RNA from each sample and followed the first-strand cRNA synthesis protocol of Invitrogen SuperScript III (Thermo Fisher Scientific, Waltham MA, USA), using oligo(dT)20 primers (Thermo Fisher Scientific, Waltham MA, USA) and omitting the RNase inhibitor step. We diluted the samples 1:20 and amplified gene sequences with AmpliTaq Gold DNA polymerase (Thermo Fisher Scientific, Waltham MA, USA) in a three-step cycling program (5 min at 95°C, 35 cycles of 40 sec at 95°C / 60 sec at 60°C / 40 sec at 72°C, 10 min at 72°C) and the following concentrations: MgCL2: 20 ng/µl, dNTPs: 2 mM, BSA: 20mg/µl, forward primer: 10 µM, reverse primer 10 µM, Taq: 5 U/µl, Buffer II: 1x.) We designed specific PCR primers for *SCR* transcript of *CgrS12 S*-allele: 5A13\_SCR\_D\_f (5'-CGGCAACTCTGCTCTTTGTTT) & 5A13\_SCR\_D\_r (5'-AGTACGGATACACTCGCATTC). As a control, we amplified a region of the *TUB* gene, which is expected to be expressed equally in all individuals using the primers AlyrTUB\_1F (5'-ACCACTCCTAGCTTTGGTGATCTG) and AlyrTUB\_2R (5'-AGGTTCACTGCG-AGCTTCCTCA).

### Expression of *SCR* in interspecific F2 individuals

To be able to separately assess the expression of *C. grandiflora* and *C. orientalis SCR* in the F2s we sequenced the *S*-haplotype from *C. grandiflora Cg88.15* segregating the in the interspecific F2s (see section "*Sequencing, assembly and annotation of BAC clones*" above). The resulting sequence was added to the modified *C. rubella* reference described above. Based on the F2 genotyping we selected 19 F2s belonging to different *S*-locus genotype classes (3 with the Cg/Cg genotype, 12 with the Cg/Co genotype and 4 with the Co/Co genotype). Total RNA was extracted from flower buds and RNAseq libraries were generated, sequenced and analyzed following the same protocol and pipeline described above. The reads were aligned to the new reference that contained the *S*-locus sequences from *C. grandiflora Cg88.15* and *C. orientalis Co1719/11*.

We separately quantified expression levels for *C. grandiflora* and *C. orientalis SCR* in the F2 individuals of different *S*-locus genotype and performed tests for differential expression among *S*-genotypes in R 3.5.0 (R Core Team 2017) with a Kruskal-Wallis rank sum test and Dunn's test of multiple comparisons using rank sums.

### Small RNA expression

To test if the *C. orientalis S*-allele expressed small RNAs similar to *A. halleri AhmirS3*, we extracted RNA using the mirVana Kit (Thermo Fisher Scientific Inc, Waltham MA, USA) from mixed stage flower buds of the same 19 F2 individuals as described in the section above

“Expression of SCR in the F2”, and obtained sequencing data for small RNA. We prepared libraries using the Illumina TruSeq small RNA kit, and sequenced them on an Illumina HiSeq2500, using a 1x51 setup with the HiSeq Rapid SBS Kit v2 sequencing chemistry (Illumina, Inc., San Diego, USA). One sample failed during sequencing and was not included in the analysis. We trimmed sequencing adapters and low quality reads with Trimmomatic v0.36 and mapped small RNA of length 18-27 nt to a modified *C. rubella* reference including the *C. orientalis* *S*-locus, as described in the above section “Expression of *S*-locus genes in *C. orientalis*” with STAR.

We identified and annotated a region highly similar to the *Ah12mirS3* small RNA precursor involved in the dominance of *A. halleri* *S12* (Durand et al. 2014) in our *C. orientalis* *S*-haplotypes, and examined expression levels of small RNAs uniquely mapping to this region. We compared the expression of sRNAs in the *Ah12mirS3*-like sRNA precursor region (hereafter termed *ComirS3s*) between *S*-genotypes with a Kruskal-Wallis rank sum test followed by a Dunn's post-hoc test. We further examined the location of the expressed *C. orientalis* small RNAs in relation to the position of *Ah12mirS3* small RNAs in *A. halleri*. For these analyses, we combined small RNAs of 3 F2 individuals homozygous for the *C. orientalis* *S*-haplotype.

### Small RNA targets

We took all *ComirS3* small RNAs of *C. orientalis* in three F2 individuals homozygous for the *C. orientalis* *S*-haplotype (described in the section above), and searched for small RNA targets within 1kb of *SCR* of the *C. grandiflora* Cg88.15 *S*-haplotype segregating in the F2 individuals using a Smith and Waterman algorithm (Smith & Waterman 1981) with the scoring matrix: matches = +1; mismatches = -1; gaps = -2; G:U wobbles = -0.5, as previously described<sup>25</sup>.

### Whole genome resequencing

We generated Illumina whole-genome resequencing data for three additional *C. orientalis* individuals (Co1981/5, Co1719/03 and Co2008/1; Table S1) for evolutionary genetic analyses of the *S*-locus and for assigning alleles as *C. orientalis* or *C. grandiflora* in the F2 mapping population. Plant growth conditions and sequencing was performed as described previously (Steige et al. 2017), and all individuals were sequenced to at least 25x coverage.

### Timing of loss of self-incompatibility in *C. orientalis*

We used a strategy similar to that in (Guo et al. 2009) to estimate a lower and upper bound of the timing of the loss of SI in *C. orientalis*. We obtained a lower bound for the timing of the loss of SI by estimating the time to the most recent common ancestor (TMRCA) based on *C. orientalis* and *C. bursa-pastoris* B subgenome *S*-locus sequences. This is possible because extensive haplotype sharing between *C. orientalis* and the *C. bursa-pastoris* B subgenome, indicates that the ancestor of *C. orientalis* that contributed to formation of *C. bursa-pastoris* was already selfing (Douglas et al. 2015). To gain an upper bound for the timing of the loss of SI we estimated the TMRCA for *C. orientalis*, *C. bursa-pastoris* B and the ancestral *C. grandiflora* *S*-haplotypes.

We supplemented our *C. orientalis* *S*-locus polymorphism data from BAC sequencing by mapping Illumina whole-genome resequencing data for 30 additional *C. orientalis* individuals (Table S1) against a *C. rubella* reference modified to include a *C. orientalis* *S*-haplotype, as described in the section “Expression of *SCR*, *SRK* and *U-box* in *C. orientalis*” above. We mapped our genomic reads with BWA-MEM and called SNPs with GATK HaplotypeCaller. Because *C. orientalis* is highly homozygous, self-compatible, and has low levels of polymorphism genome-wide (Douglas et al. 2015), this approach is expected to

work well, as long as a *C. orientalis* *S*-haplotype is included in the reference genome. We filtered sites following GATK recommended hard filtering with the following parameters; QD < 2.0 || FS > 60.0 || MQ < 40.0 || MQRankSum < -12.5 || ReadPosRankSum < -8.0. We required at minimum read depth of 15 and maximum of 200. As mapping can be uncertain in repeat regions and in the presence of transposable element with filtered out those regions using repeatMasker. Heterozygous SNPs were also hard masked in the alignment. Finally, the vcf file for the three *C. orientalis* samples was transformed to fasta format.

We produced an alignment of 37 *S*-locus sequences including the *C. grandiflora* *CgS12* *S*-haplotype, 4 *C. bursa-pastoris* subgenome B *S*-haplotypes and *S*-haplotype data for 32 *C. orientalis* individuals. Sequences were aligned using block alignment using Muscle v.3.8.31 (Edgar 2004) as implemented in AliView v.1.20 (Larsson 2014). The total length of the *S*-locus alignment (excluding *C. orientalis* orthologs of the genes At4g21350 and At4g21380) was 33485 bp, 22689 bp had indels in at least one sequence, 9835 of invariant and 876 polymorphic sites. The alignment was partitioned into coding and non-coding regions following the annotation and sites with indels were pruned before further analysis of polymorphism and divergence in dnaSP v6 (Rozas et al. 2017).

To obtain estimates of the upper and lower bound of the timing of the loss of self-incompatibility, we followed an approach similar to that in (Guo et al. 2009), although here we base our analyses on data for the entire *S*-locus, not only *SRK*. We estimated the timing of the splits between *C. grandiflora*, *C. bursa-pastoris* and *C. orientalis* as well as the crown age of *C. orientalis* using a strict molecular clock in a Bayesian framework as implemented in BEAST2 (Bouckaert et al. 2014). The TMRCA for all included samples provides an estimate of the upper bound of the timing of the loss of SI in *C. orientalis*, whereas the TMRCA of *C. orientalis* and *C. bursa-pastoris* provides a lower bound of the timing of the loss of SI. This approach assumes that the ancestor of *C. bursa-pastoris* from the *C. orientalis* lineage was already self-fertilizing, as inferred previously based on genome-wide haplotype conservation between the *C. bursa-pastoris* B subgenome and *C. orientalis* (Douglas et al. 2015).

In our analyses, the clock rate was fixed assuming a mutation rate of  $7 \times 10^{-9}$  substitutions per sites per generation (Ossowski et al. 2010) and we used a generation time of one year. The best substitution models inferred in PartitionFinder2 v.2.1.1 (Lanfear et al. 2012; Lanfear et al. 2017) for the coding and non-coding partition were GTR + G and HKY + I respectively. We ran both a complex model with exponential changes in population size and a model with a constant population size, and assessed whether the more complex model gave a significant improvement in likelihood using aicm (Baele et al 2012). The exponential growth model gave a slight improvement in aicm and we therefore present results from both model (Tables S5). We ran two chains of 10 millions generations sampled every 1000 generations and checked the convergence by visual inspection of the log-likelihood profile and assuring ESS value above 200. The posterior distribution of trees was used to build a maximum clade credibility tree and estimate node age and 95% credibility interval using TreeAnnotator (Drummond et al. 2012).

414 **Supplementary Tables**

415

416 **Table S1.** Overview of plant accessions used in this study.

| Species              | Accession       | Population | Origin <sup>1</sup> | ENA numbers         | Purpose                                                                          |
|----------------------|-----------------|------------|---------------------|---------------------|----------------------------------------------------------------------------------|
| <i>C. orientalis</i> | Co2008-1        | 2008       | CH                  | SRR1481629<br>(WGS) | Seed parent of F1 parent of F2 mapping population;<br>whole-genome resequencing. |
| <i>C. orientalis</i> | Co1719/11       | 1719       | MN                  | tbd                 | S-locus BAC sequencing; Expression analyses;<br>Controlled crosses               |
| <i>C. orientalis</i> | Co1979/09       | 1979       | RU                  | tbd                 | S-locus BAC sequencing; Expression analyses;<br>Controlled crosses               |
| <i>C. orientalis</i> | DKCo_1_1718-9   | 1718       | MN                  | ERR636109           | Whole-genome resequencing                                                        |
| <i>C. orientalis</i> | DKCo_2_1719-1   | 1719       | MN                  | ERR636115           | Whole-genome resequencing                                                        |
| <i>C. orientalis</i> | Co1719/03       | 1719       | MN                  | tbd                 | Whole-genome resequencing                                                        |
| <i>C. orientalis</i> | 1719-4          |            | MN                  | SRR1463025          | Whole-genome resequencing                                                        |
| <i>C. orientalis</i> | DKCo_3_1938-1_1 | 1938       | KZ                  | ERR636116           | Whole-genome resequencing                                                        |
| <i>C. orientalis</i> | DKCo_4_1939-1_6 | 1939       | KZ                  | ERR636117           | Whole-genome resequencing                                                        |
| <i>C. orientalis</i> | DKCo_5_1940-1_1 | 1940       | KZ                  | ERR636118           | Whole-genome resequencing                                                        |
| <i>C. orientalis</i> | DKCo_6_1978-6   | 1978       | RU                  | ERR636119           | Whole-genome resequencing                                                        |
| <i>C. orientalis</i> | 1979-1          | 1979       | RU                  | SRR1481500          | Whole-genome resequencing                                                        |
| <i>C. orientalis</i> | DKCo_7_1979-02  | 1979       | RU                  | ERR636120           | Whole-genome resequencing                                                        |
| <i>C. orientalis</i> | 1979-7          | 1979       | RU                  | SRR1481499          | Whole-genome resequencing                                                        |
| <i>C. orientalis</i> | DKCo_8_1980-1   | 1980       | RU                  | ERR636121           | Whole-genome resequencing                                                        |

|                       |                 |      |    |            |                                                                                     |
|-----------------------|-----------------|------|----|------------|-------------------------------------------------------------------------------------|
| <i>C. orientalis</i>  | DKCo_9_1981-3   | 1981 | RU | ERR636122  | Whole-genome resequencing                                                           |
| <i>C. orientalis</i>  | Co1981/5        | 1981 | RU | tbd        | Whole-genome resequencing                                                           |
| <i>C. orientalis</i>  | 1981-6          | 1981 | RU | SRR1481625 | Whole-genome resequencing                                                           |
| <i>C. orientalis</i>  | 1981-10         | 1981 | RU | SRR1481618 | Whole-genome resequencing                                                           |
| <i>C. orientalis</i>  | DKCo_10_1982-9  | 1982 | RU | ERR636107  | Whole-genome resequencing                                                           |
| <i>C. orientalis</i>  | DKCo_11_1983-6  | 1983 | RU | ERR636108  | Whole-genome resequencing                                                           |
| <i>C. orientalis</i>  | DKCo_12_1984-2  | 1984 | RU | ERR636110  | Whole-genome resequencing                                                           |
| <i>C. orientalis</i>  | 1985-1          | 1985 | RU | SRR1481626 | Whole-genome resequencing                                                           |
| <i>C. orientalis</i>  | DKCo_13_1985-11 | 1986 | RU | ERR636111  | Whole-genome resequencing                                                           |
| <i>C. orientalis</i>  | DKCo_15_2006-01 | 2006 | CH | ERR636112  | Whole-genome resequencing                                                           |
| <i>C. orientalis</i>  | DKCo_16_2007-03 | 2007 | CH | ERR636113  | Whole-genome resequencing                                                           |
| <i>C. orientalis</i>  | Co2008-2_1      | 2008 | CH | tbd        | Whole-genome resequencing                                                           |
| <i>C. orientalis</i>  | 2008-07-01      | 2008 | CH | SRR1481628 | Whole-genome resequencing                                                           |
| <i>C. orientalis</i>  | 2008-09-01      | 2008 | CH | SRR1481627 | Whole-genome resequencing                                                           |
| <i>C. orientalis</i>  | FY1             | FY1  | CH | SRR6179226 | Whole-genome resequencing                                                           |
| <i>C. orientalis</i>  | QH1             | QH1  | CH | SRR6179228 | Whole-genome resequencing                                                           |
| <i>C. orientalis</i>  | QH2             | QH2  | CH | SRR6179227 | Whole-genome resequencing                                                           |
| <i>C. grandiflora</i> | Cg88.15         | 88   | GR | tbd        | Pollen parent of F1 parent of F2 mapping population; <i>S</i> -locus BAC sequencing |
| <i>C. grandiflora</i> | Cg2-2-KS2       | 2    | GR | tbd        | <i>S</i> -locus BAC sequencing; offspring used in controlled crosses.               |

|                          |               |      |    |     |                                             |
|--------------------------|---------------|------|----|-----|---------------------------------------------|
| <i>C. bursa-pastoris</i> | CbpWEDE9.136  | DE9  | DE | tbd | <i>S</i> -locus BAC sequencing              |
| <i>C. bursa-pastoris</i> | CbpWESE11.139 | SE11 | SE | tbd | <i>S</i> -locus BAC sequencing              |
| <i>C. bursa-pastoris</i> | CbpKMB205     | KMB  | CH | tbd | <i>S</i> -locus BAC sequencing <sup>2</sup> |
| <i>C. bursa-pastoris</i> | CbpGY36       | GY   | CH | tbd | <i>S</i> -locus BAC sequencing <sup>2</sup> |
| <i>C. bursa-pastoris</i> | CbpAQ416      | AQ   | CH | tbd | <i>S</i> -locus BAC sequencing              |

<sup>1</sup>Geographical origin; CH=China, DE=Germany, KZ=Kazakhstan, MN=Mongolia, RU=Russia, SE=Sweden, GR=Greece. More information on the geographical origin of *C. orientalis* samples is given in Hurka et al. (2012) and more information on the origin of the *C. bursa-pastoris* samples is available in Slotte et al. (2009). We further used publicly available *C. orientalis* genome resequencing data produced by Douglas et al. (2015), Huang et al. (2018) and Daniel Koenig and Detlef Weigel, Max Planck Institute for Developmental Biology.

<sup>2</sup> One BAC library containing material from both accessions was produced.



**Table S2.** Information on sequence length and coverage for SMRT and MiSeq sequencing of BAC clones.

| Species                  | Accession                                      | Coverage<br>SMRT<br>raw<br>assembly<br>(x) | SMRT<br>N50 read<br>length<br>(bp) | MiSeq<br>coverage<br>(x) | Final length<br>of <i>S</i> -locus<br>contig |
|--------------------------|------------------------------------------------|--------------------------------------------|------------------------------------|--------------------------|----------------------------------------------|
| <i>C. grandiflora</i>    | Cg2-2-KS2                                      | 239                                        | 28 737                             | 3 777                    | 115 410                                      |
| <i>C. grandiflora</i>    | Cg88.15                                        | 454                                        | 24 362                             | 386                      | 128 278                                      |
| <i>C. orientalis</i>     | Co1719/11                                      | 150                                        | 25 308                             | 2 689                    | 167 282                                      |
| <i>C. orientalis</i>     | Co1979/09                                      | 256                                        | 27 620                             | 4 693                    | 93 370                                       |
| <i>C. bursa-pastoris</i> | CbpWEDE9.136                                   | 246                                        | 24 893                             | 4 215                    | 114 127                                      |
| <i>C. bursa-pastoris</i> | CbpWESE11.139                                  | 399                                        | 25 568                             | 4 380                    | 99 499                                       |
| <i>C. bursa-pastoris</i> | CbpAQ416                                       | 338                                        | 25 653                             | 3 157                    | 131 978                                      |
| <i>C. bursa-pastoris</i> | CbpCH1<br>(CbpKMB205,<br>CbpGY36) <sup>1</sup> | 252                                        | 27 925                             | 1 967                    | 189 744                                      |

<sup>1</sup> One BAC library containing material from both accessions CbpKMB205 and CbpGY36 was produced, and the resulting *S*-haplotype sequence is designated CbpCH1 here.

430

431

432

433

**Table S3.** Polymorphism and divergence at the *S*-locus. *S* is the number of segregating sites, and  $\pi$  is nucleotide diversity. Nonsynonymous and synonymous polymorphism was estimated (Nei & Gojobori 1986) in an alignment with codons containing indels removed.

| Species                  | Region       | <i>n</i> | Sites | Syn sites <sup>1</sup> | Nonsyn sites <sup>2</sup> | <i>S</i> | <i>S</i> <sub>syn</sub> <sup>3</sup> | <i>S</i> <sub>nonsyn</sub> <sup>4</sup> | $\pi$ syn <sup>5</sup> | $\pi$ nonsyn <sup>6</sup> | $\pi$ tot <sup>7</sup> | <i>Ks</i> to <i>CgS12</i> <sub>8</sub> | <i>Ka</i> to <i>CgS12</i> <sub>9</sub> | <i>Ks</i> to <i>AhS12</i> <sub>10</sub> | <i>Ka</i> to <i>AhS12</i> <sub>11</sub> |
|--------------------------|--------------|----------|-------|------------------------|---------------------------|----------|--------------------------------------|-----------------------------------------|------------------------|---------------------------|------------------------|----------------------------------------|----------------------------------------|-----------------------------------------|-----------------------------------------|
| <i>C. orientalis</i>     | <i>SRK</i>   | 29       | 2516  | 562.2                  | 1912.8                    | 2        | 0                                    | 2                                       | 0                      | 0.00053                   | 0.00040                | 0.040                                  | 0.0107                                 | 0.176                                   | 0.0431                                  |
|                          | <i>SCR</i>   | 29       | 226   | 51.5                   | 173.5                     | 0        | 0                                    | 0                                       | 0                      | 0                         | 0                      | 0.103                                  | 0.0173                                 | 0.237                                   | 0.1008                                  |
|                          | <i>U-BOX</i> | 29       | 1125  | 279.1                  | 845.9                     | 0        | 0                                    | 0                                       | 0                      | 0                         | 0                      | 0.063                                  | 0.0065                                 | 0.208                                   | 0.0266                                  |
|                          | Non-coding   | 29       | 8693  | -                      | -                         | 22       | -                                    | -                                       | -                      | -                         | 0.00091                | -                                      | -                                      | -                                       | -                                       |
| <i>C. bursa-pastoris</i> | <i>SRK</i>   | 4        | 2550  | 576.7                  | 1961.3                    | 4        | 2                                    | 2                                       | 0.00202                | 0.00059                   | 0.00092                | 0.040                                  | 0.0108                                 | 0.175                                   | 0.0424                                  |
|                          | <i>SCR</i>   | 4        | 215   | 49.9                   | 163.1                     | 0        | 0                                    | 0                                       | 0                      | 0                         | 0                      | 0.107                                  | 0.0184                                 | 0.247                                   | 0.1010                                  |
|                          | <i>U-BOX</i> | 4        | 1125  | 279.0                  | 846.0                     | 1        | 0                                    | 1                                       | 0                      | 0.00079                   | 0.00059                | 0.063                                  | 0.0071                                 | 0.208                                   | 0.0272                                  |
|                          | Non-coding   | 4        | 10382 | -                      | -                         | 24       | -                                    | -                                       | -                      | -                         | 0.00140                | -                                      | -                                      | -                                       | -                                       |

434

435

436

437

438

439

440

441

442

443

444

445

<sup>1</sup>Synonymous sites<sup>2</sup>Nonsynonymous sites<sup>3</sup>Synonymous segregating sites<sup>4</sup>Nonsynonymous segregating sites<sup>5</sup>Synonymous nucleotide diversity<sup>6</sup>Nonsynonymous nucleotide diversity<sup>7</sup>Total nucleotide diversity<sup>8</sup>Synonymous divergence between the focal species and *C. grandiflora CgS12*.<sup>9</sup>Nonsynonymous divergence between the focal species and *C. grandiflora CgS12*.<sup>10</sup>Synonymous divergence between the focal species and *A. halleri AhS12*.<sup>11</sup>Nonsynonymous divergence between the focal species and *A. halleri AhS12*.

**Table S4.** Expression of *SRK*, *SCR* and *U-box* in flower buds and leaves of two *C. orientalis* accessions.

| Accession name | Tissue | Gene name    | Mean RPKM (standard error) |
|----------------|--------|--------------|----------------------------|
| Co1719/11      | Flower | <i>SRK</i>   | 1.693(0.879)               |
| Co1719/11      | Leaf   | <i>SRK</i>   | 0.019(0.009)               |
| Co1979/09      | Flower | <i>SRK</i>   | 2.585(0.322)               |
| Co1979/09      | Leaf   | <i>SRK</i>   | 0(0)                       |
| Co1719/11      | Flower | <i>SCR</i>   | 13.336(6.767)              |
| Co1719/11      | Leaf   | <i>SCR</i>   | 0(0)                       |
| Co1979/09      | Flower | <i>SCR</i>   | 0.5(0.277)                 |
| Co1979/09      | Leaf   | <i>SCR</i>   | 0(0)                       |
| Co1719/11      | Flower | <i>U-box</i> | 4.157(0.427)               |
| Co1719/11      | Leaf   | <i>U-box</i> | 9.582(0.007)               |
| Co1979/09      | Flower | <i>U-box</i> | 5.737(0.213)               |
| Co1979/09      | Leaf   | <i>U-box</i> | 8.313(0.075)               |

**Table S5.** Results of the timing of the loss of self-incompatibility performed in BEAST with two competing models of population size change, constant and exponential respectively. Positive value of delta aicm indicates a better fit. Median ages and 95% confidence intervals in Ma are given for the MRCA of *C.grandiflora* CgSI2, *C.orientalis* and *C.bursa-pastoris* B representing the upper bound for loss of SI, as well the MRCA of *C.orientalis* and *C.bursa-pastoris* B corresponding to the lower bound.

|                           | <b>Lnl</b> | <b>aicm</b> | <b>delta aicm</b> | <b>Upper bound</b> | <b>Lower bound</b> |
|---------------------------|------------|-------------|-------------------|--------------------|--------------------|
| <b>Exponential growth</b> | -13966.8   | 27970.7     | 8.08              | 2.57 (2.21 – 2.9)  | 0.07 (0.05 - 0.1)  |
| <b>Constant</b>           | -13969.4   | 27978.8     |                   | 2.48 (2.15 - 2.8)  | 0.08 (0.05 - 0.12) |

460 **Supplementary Figures**

461

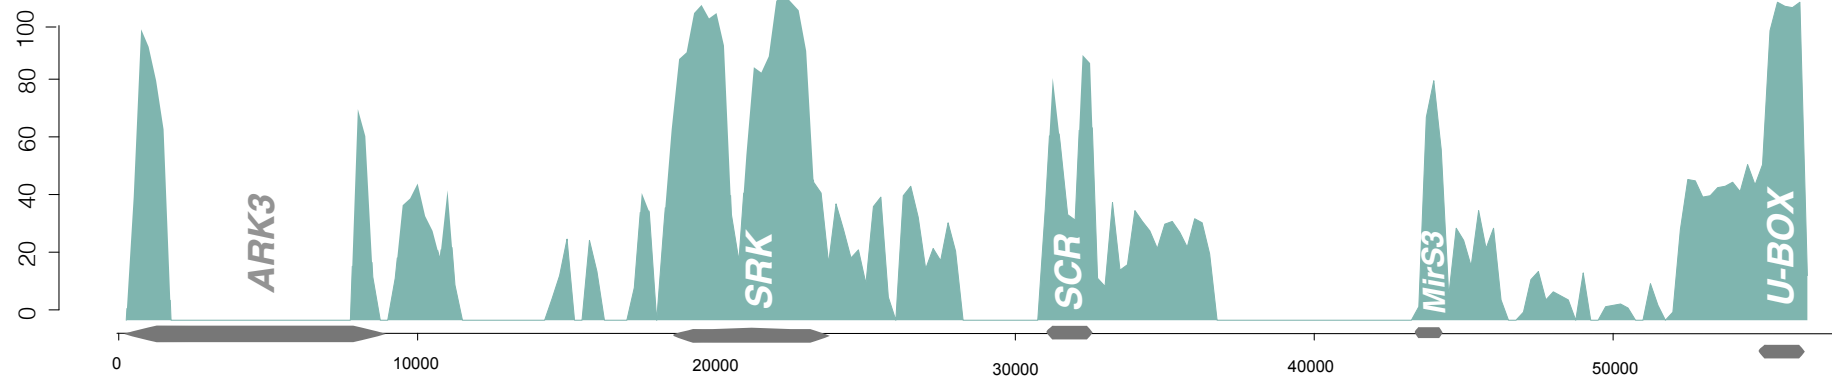

462

463

464 **Figure S1.** Sequence conservation (% identity) between *C. grandiflora* CgS12 and *A. halleri* S12. The low sequence similarity in the middle of  
465 *ARK3* is due to the presence of a 6367 bp indel difference between the two sequences.

466  
467

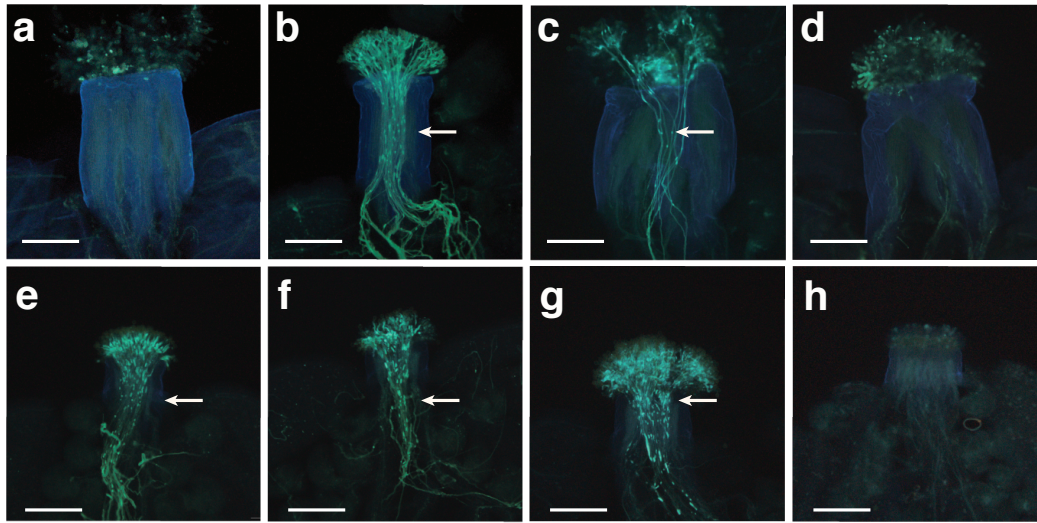

468  
469  
470  
471  
472  
473  
474  
475  
476  
477  
478  
479  
480  
481  
482

**Figure S2. Success of controlled crosses based on pollen tube germination assays.** **a.** Self-pollination of *C. grandiflora* carrying *CgS12* results in no pollen tube growth (incompatible reaction), demonstrating functional SI. **b.** Pollination of *C. grandiflora* carrying *CgS12* with pollen from an individual carrying a different S-haplotype results in pollen tube growth (compatible reaction). **c.** Pollination of *C. grandiflora* carrying *CgS12* with pollen from *C. orientalis* results in pollen tube growth (compatible reaction), demonstrating that *C. orientalis* SCR is not functional. **d.** No pollination of *C. grandiflora* carrying *CgS12* results in no pollen tube growth, demonstrating low risk of accidental cross-pollination in the crossing experiment. **e.** Self-pollination of *C. orientalis* shows self-compatibility (compatible reaction). **f.** Pollination of *C. orientalis* with pollen from a *C. grandiflora* individual carrying a different S-haplotype results in pollen tube growth (compatible reaction). **g.** Pollination of *C. orientalis* with pollen from a *C. grandiflora* carrying *CgS12* results in pollen tube growth (compatible reaction). **h.** No pollination of *C. orientalis* results in no pollen tube growth, demonstrating low risk of accidental cross-pollination in the crossing experiment.

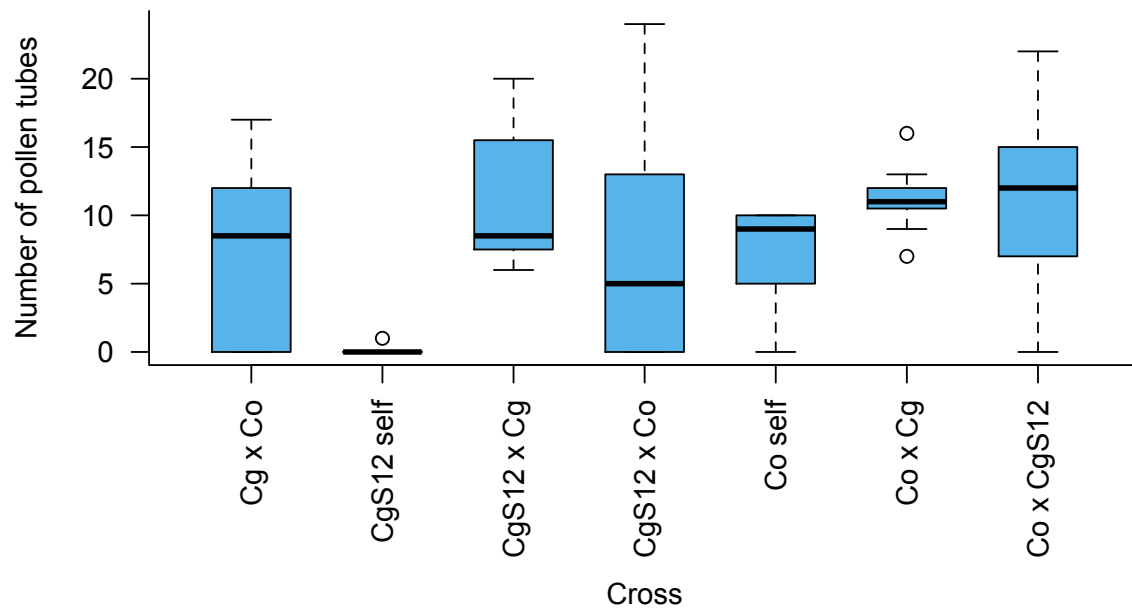

**Figure S3. Number of pollen tubes in controlled crosses of *C. orientalis*, *C. grandiflora* harboring *CgS12*, and *C. grandiflora* harboring other *S*-haplotypes.** There is a significant difference in the number of pollen tubes depending on the type of cross (Kruskal-Wallis  $\chi^2=35.126$ ,  $df=6$ ,  $P<0.001$ ).

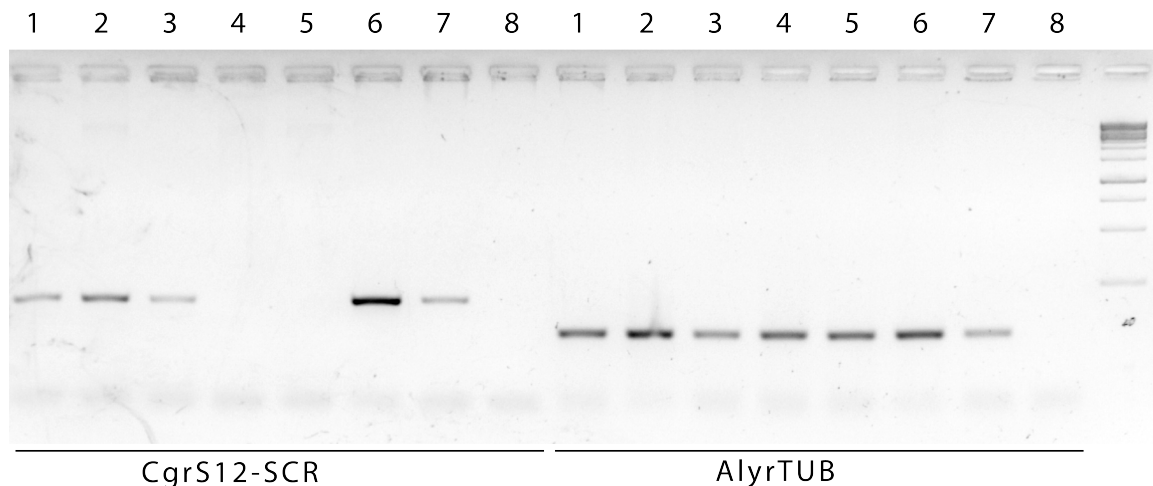

**Figure S4. Qualitative RT-PCR demonstrating expression of *SCR* in flower buds of *C. orientalis* and *C. grandiflora* individuals with *CgS12*.**

Samples 1-3: different *C. grandiflora* individuals harbouring the *CgS12* *S*-allele, Samples 4-5: different *C. grandiflora* individuals with other *S*-alleles, Samples 6-7: two different *C. orientalis* genotypes - Co1719/11 and Co1979/09, respectively, Sample 8: negative control. 1kb GeneRuler DNA ladder for size reference. *CgS12-SCR* is expressed in *C. grandiflora* harbouring the *CgS12* *S*-allele and in *C. orientalis*, but not in other *C. grandiflora* individuals. *TUB* is expressed in all samples.



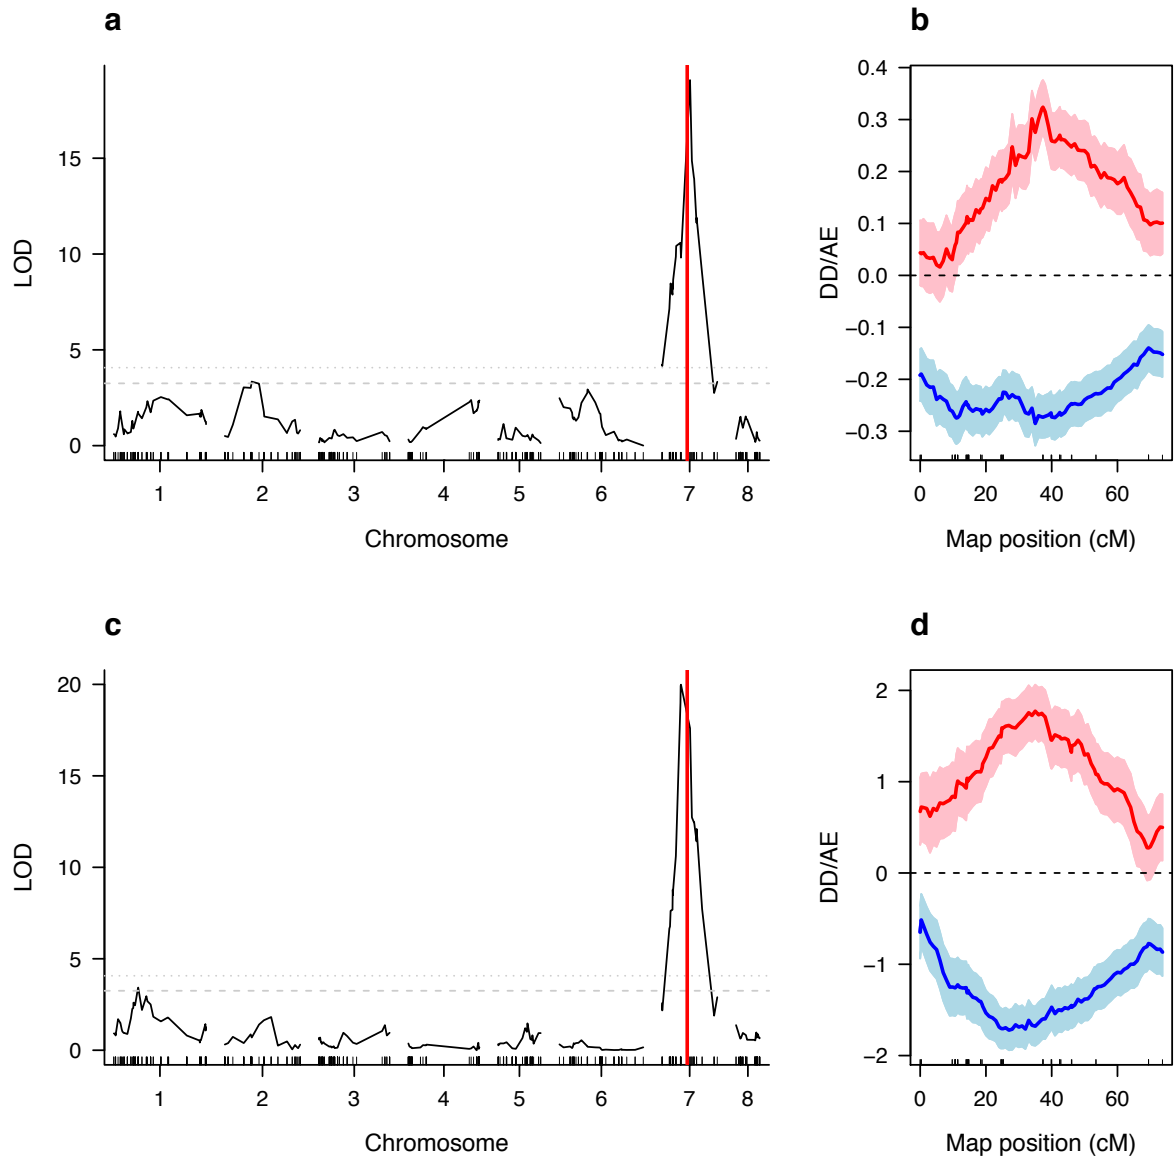

**Figure S5. QTL mapping on phenotyping scores separately.**

**a.** LOD profile resulting from interval mapping of SC/SI scores after autonomous self-pollination. The dotted and dashed lines indicate the 1% vs. 5% genome-wide permutation-based significance threshold. The red vertical line shows the location of the canonical Brassicaceae *S*-locus. The 1.5-LOD confidence interval ranges from position 6,241,223 to 8,742,368, whereas the *S*-locus is located between positions 7,523,602 and 7,562,919 on chromosome 7. **b.** Estimated QTL additive effect (red line) and dominance deviation (blue line) across chromosome 7 for the visual SC/SI score. Light shaded regions indicate standard errors. **c.** LOD profile resulting from interval mapping of the number of siliques formed after manual hand-pollination. The 1.5-LOD confidence interval ranges from position 5,061,589 to 8,304,045. **d.** Estimated QTL additive effect (red line) and dominance deviation (blue line) across chromosome 7 for the number of siliques formed. Light shaded regions indicate standard errors.

## References

- Bachmann JA, Tedder A, Laenen B, Steige KA, Slotte T. 2018. Targeted long-read sequencing of a locus under long-term balancing selection in *Capsella*. *G3* 8:1327–1333.
- Baele, G., Li, W. L. S., Drummond, A. J., Suchard, M. A., & Lemey, P. 2012. Accurate model selection of relaxed molecular clocks in Bayesian phylogenetics. *Mol. Biol. Evol.* 30(2): 239–243.
- Bolger AM, Lohse M, Usadel B. 2014. Trimmomatic: a flexible trimmer for Illumina sequence data. *Bioinformatics* 30:2114–2120.
- Bouckaert R, Heled J, Kühnert D, Vaughan T, Wu C-H, Xie D, Suchard MA, Rambaut A, Drummond AJ. 2014. BEAST 2: a software platform for Bayesian evolutionary analysis. *PLoS Comp Biol* 10:e1003537.
- Broman KW, Wu H, Sen S, Churchill GA. 2003. R/qtl: QTL mapping in experimental crosses.
- Castric V, Bechsgaard J, Schierup MH, Vekemans X. 2008. Repeated adaptive introgression at a gene under multiallelic balancing selection. *PLoS Genet* 4:e1000168.
- DePristo MA, Banks E, Poplin R, Garimella KV, Maguire JR, Hartl C, Philippakis AA, del Angel G, Rivas MA, Hanna M, et al. 2011. A framework for variation discovery and genotyping using next-generation DNA sequencing data. *Nat Genet* 43:491–498.
- Dobin A, Davis CA, Schlesinger F, Drenkow J, Zaleski C, Jha S, Batut P, Chaisson M, Gingeras TR. 2013. STAR: ultrafast universal RNA-seq aligner. *Bioinformatics* 29:15–21.
- Douglas GM, Gos G, Steige KA, Salcedo A, Holm K, Josephs EB, Arunkumar R, Agren JA, Hazzouri KM, Wang W, et al. 2015. Hybrid origins and the earliest stages of diploidization in the highly successful recent polyploid *Capsella bursa-pastoris*. *Proc Natl Acad Sci USA* 112:2806–2811.
- Drummond AJ, Suchard MA, Xie D, Rambaut A. 2012. Bayesian phylogenetics with BEAUti and the BEAST 1.7. *Mol Biol Evol* 29:1969–1973.
- Durand E, Méheust R, Soucaze M, Goubet PM, Gallina S, Poux C, Fobis-Loisy I, Guillon E, Gaude T, Sarazin A, et al. 2014. Dominance hierarchy arising from the evolution of a complex small RNA regulatory network. *Science* 346:1200–1205.
- Edgar RC. 2004. MUSCLE: multiple sequence alignment with high accuracy and high throughput. *Nucleic Acids Res* 32:1792–1797.
- Gouy M, Guindon S, Gascuel O. 2010. SeaView version 4: A multiplatform graphical user interface for sequence alignment and phylogenetic tree building. *Mol Biol Evol* 27:221–224.
- Guo Y-L, Bechsgaard JS, Slotte T, Neuffer B, Lascoux M, Weigel D, Schierup MH. 2009. Recent speciation of *Capsella rubella* from *Capsella grandiflora*, associated with loss of self-incompatibility and an extreme bottleneck. *Proc Natl Acad Sci USA* 106:5246–5251.
- Hurka H, Friesen N, German DA, Franzke A, Neuffer B. 2012. “Missing link” species *Capsella orientalis* and *Capsella thracica* elucidate evolution of model plant genus *Capsella* (Brassicaceae). *Mol Ecol* 21:1223–1238.
- Huang H-R, Liu J-J, Xu Y, Lascoux M, Ge X-J, Wright SI. 2018. Homeologue-specific expression divergence in the recently formed tetraploid *Capsella bursa-pastoris* (Brassicaceae). *New Phytol* 42:e46–e635.
- Holt C, Yandell M. 2011. MAKER2: an annotation pipeline and genome-database management tool for second-generation genome projects. *BMC Bioinformatics* 12:491.
- Katoh K, Misawa K, Kuma K-I, Miyata T. 2002. MAFFT: a novel method for rapid multiple sequence alignment based on fast Fourier transform. *Nucleic Acids Res* 30:3059–3066.
- Koren S, Walenz BP, Berlin K, Miller JR, Bergman NH, Phillippy AM. 2017. Canu: scalable

- and accurate long-read assembly via adaptive k-mer weighting and repeat separation. *Genome Res* 27:722–736.
- Lanfear R, Calcott B, Ho SYW, Guindon S. 2012. Partitionfinder: combined selection of partitioning schemes and substitution models for phylogenetic analyses. *Mol Biol Evol* 29:1695–1701.
- Lanfear R, Frandsen PB, Wright AM, Senfeld T, Calcott B. 2017. PartitionFinder 2: New methods for selecting partitioned models of evolution for molecular and morphological phylogenetic analyses. *Mol Biol Evol* 34:772–773.
- Larsson A. 2014. AliView: a fast and lightweight alignment viewer and editor for large datasets. *Bioinformatics* 30:3276–3278.
- Li H. 2013. Aligning sequence reads, clone sequences and assembly contigs with BWA-MEM. arXiv:1303.3997v2, <https://arxiv.org/abs/1303.3997v2>.
- McKenna A, Hanna M, Banks E, Sivachenko A, Cibulskis K, Kernytsky A, Garimella K, Altshuler D, Gabriel S, Daly M, et al. 2010. The Genome Analysis Toolkit: a MapReduce framework for analyzing next-generation DNA sequencing data. *Genome Res* 20:1297–1303.
- Mortazavi A, Williams BA, McCue K, Schaeffer L, Wold B. 2008. Mapping and quantifying mammalian transcriptomes by RNA-Seq. *Nat Methods* 5:621–628.
- Nei M, Gojobori T. 1986. Simple methods for estimating the numbers of synonymous and nonsynonymous nucleotide substitutions. *Mol Biol Evol* 3:418–426.
- Ossowski S, Schneeberger K, Lucas-Lledó JI, Warthmann N, Clark RM, Shaw RG, Weigel D, Lynch M. 2010. The rate and molecular spectrum of spontaneous mutations in *Arabidopsis thaliana*. *Science* 327:92–94.
- R Core Team 2017. R: A language and environment for statistical computing.
- Robinson JT, Thorvaldsdóttir H, Winckler H, Guttman M, Lander ES, Getz G & Mesirov JP. 2011. Integrative genomics viewer. *Nature Biotechnology* 29:24–26.
- Rozas J, Ferrer-Mata A, Sánchez-DelBarrio JC, Guirao-Rico S, Librado P, Ramos-Onsins SE, Sanchez-Gracia A. 2017. DnaSP 6: DNA Sequence Polymorphism Analysis of Large Data Sets. *Mol Biol Evol* 34:3299–3302.
- Shiba H, Kakizaki T, Iwano M, Tarutani Y, Watanabe M, Isogai A, Takayama S. 2006. Dominance relationships between self-incompatibility alleles controlled by DNA methylation. *Nat Genet* 38:297–299.
- Slotte T, Huang H-R, Holm K, Ceplitis A, Onge KS, Chen J, Lagercrantz U, Lascoux M. 2009. Splicing variation at a *FLOWERING LOCUS C* homeolog is associated with flowering time variation in the tetraploid *Capsella bursa-pastoris*. *Genetics* 183:337–345.
- Slotte T, Hazzouri KM, Agren JA, Koenig D, Maumus F, Guo Y-L, Steige K, Platts AE, Escobar JS, Newman LK, et al. 2013. The *Capsella rubella* genome and the genomic consequences of rapid mating system evolution. *Nat Genet* 45:831–835.
- Smith, TF, Waterman, MS. 1981. Identification of common molecular subsequences. *J Mol Biol* 147:195–197.
- Stanke M, Steinkamp R, Waack S, Morgenstern B. 2004. AUGUSTUS: a web server for gene finding in eukaryotes. *Nucleic Acids Res* 32:W309–W312.
- Steige KA, Laenen B, Reimegård J, Scofield DG, Slotte T. 2017. Genomic analysis reveals major determinants of cis-regulatory variation in *Capsella grandiflora*. *Proc Natl Acad Sci USA* 114:1087–1092.
- Tsuchimatsu T, Kaiser P, Yew C-L, Bachelier JB, Shimizu KK. 2012. Recent loss of self-incompatibility by degradation of the male component in allotetraploid *Arabidopsis kamchatica*. *PLoS Genet* 8:e1002838.
- Van der Auwera GA, Carneiro MO, Hartl C, Poplin R, del Angel G, Levy-Moonshine A, Jordan T, Shakir K, Roazen D, Thibault J, et al. 2013. From FastQ data to high

612 confidence variant calls: the Genome Analysis Toolkit best practices pipeline. Curr  
613 Protoc Bioinformatics 11:11.10.1–11.10.33.  
614 Williamson RJ, Josephs EB, Platts AE, Hazzouri KM, Haudry A, Blanchette M, Wright SI.  
615 2014. Evidence for widespread positive and negative selection in coding and conserved  
616 noncoding regions of *Capsella grandiflora*. PLoS Genet 10:e1004622.
